# Supplementary material for: Immune stimulation recruits a subset of pro-regenerative macrophages to the retina that promotes axonal regrowth of injured neurons
Source: PubMed Central journal article supplement (PMC10210300; doi:10.1186/s40478-023-01580-3), 2023-05-24
Supplement: 40478_2023_1580_MOESM1_ESM.pdf [file 40478_2023_1580_MOESM1_ESM.pdf]

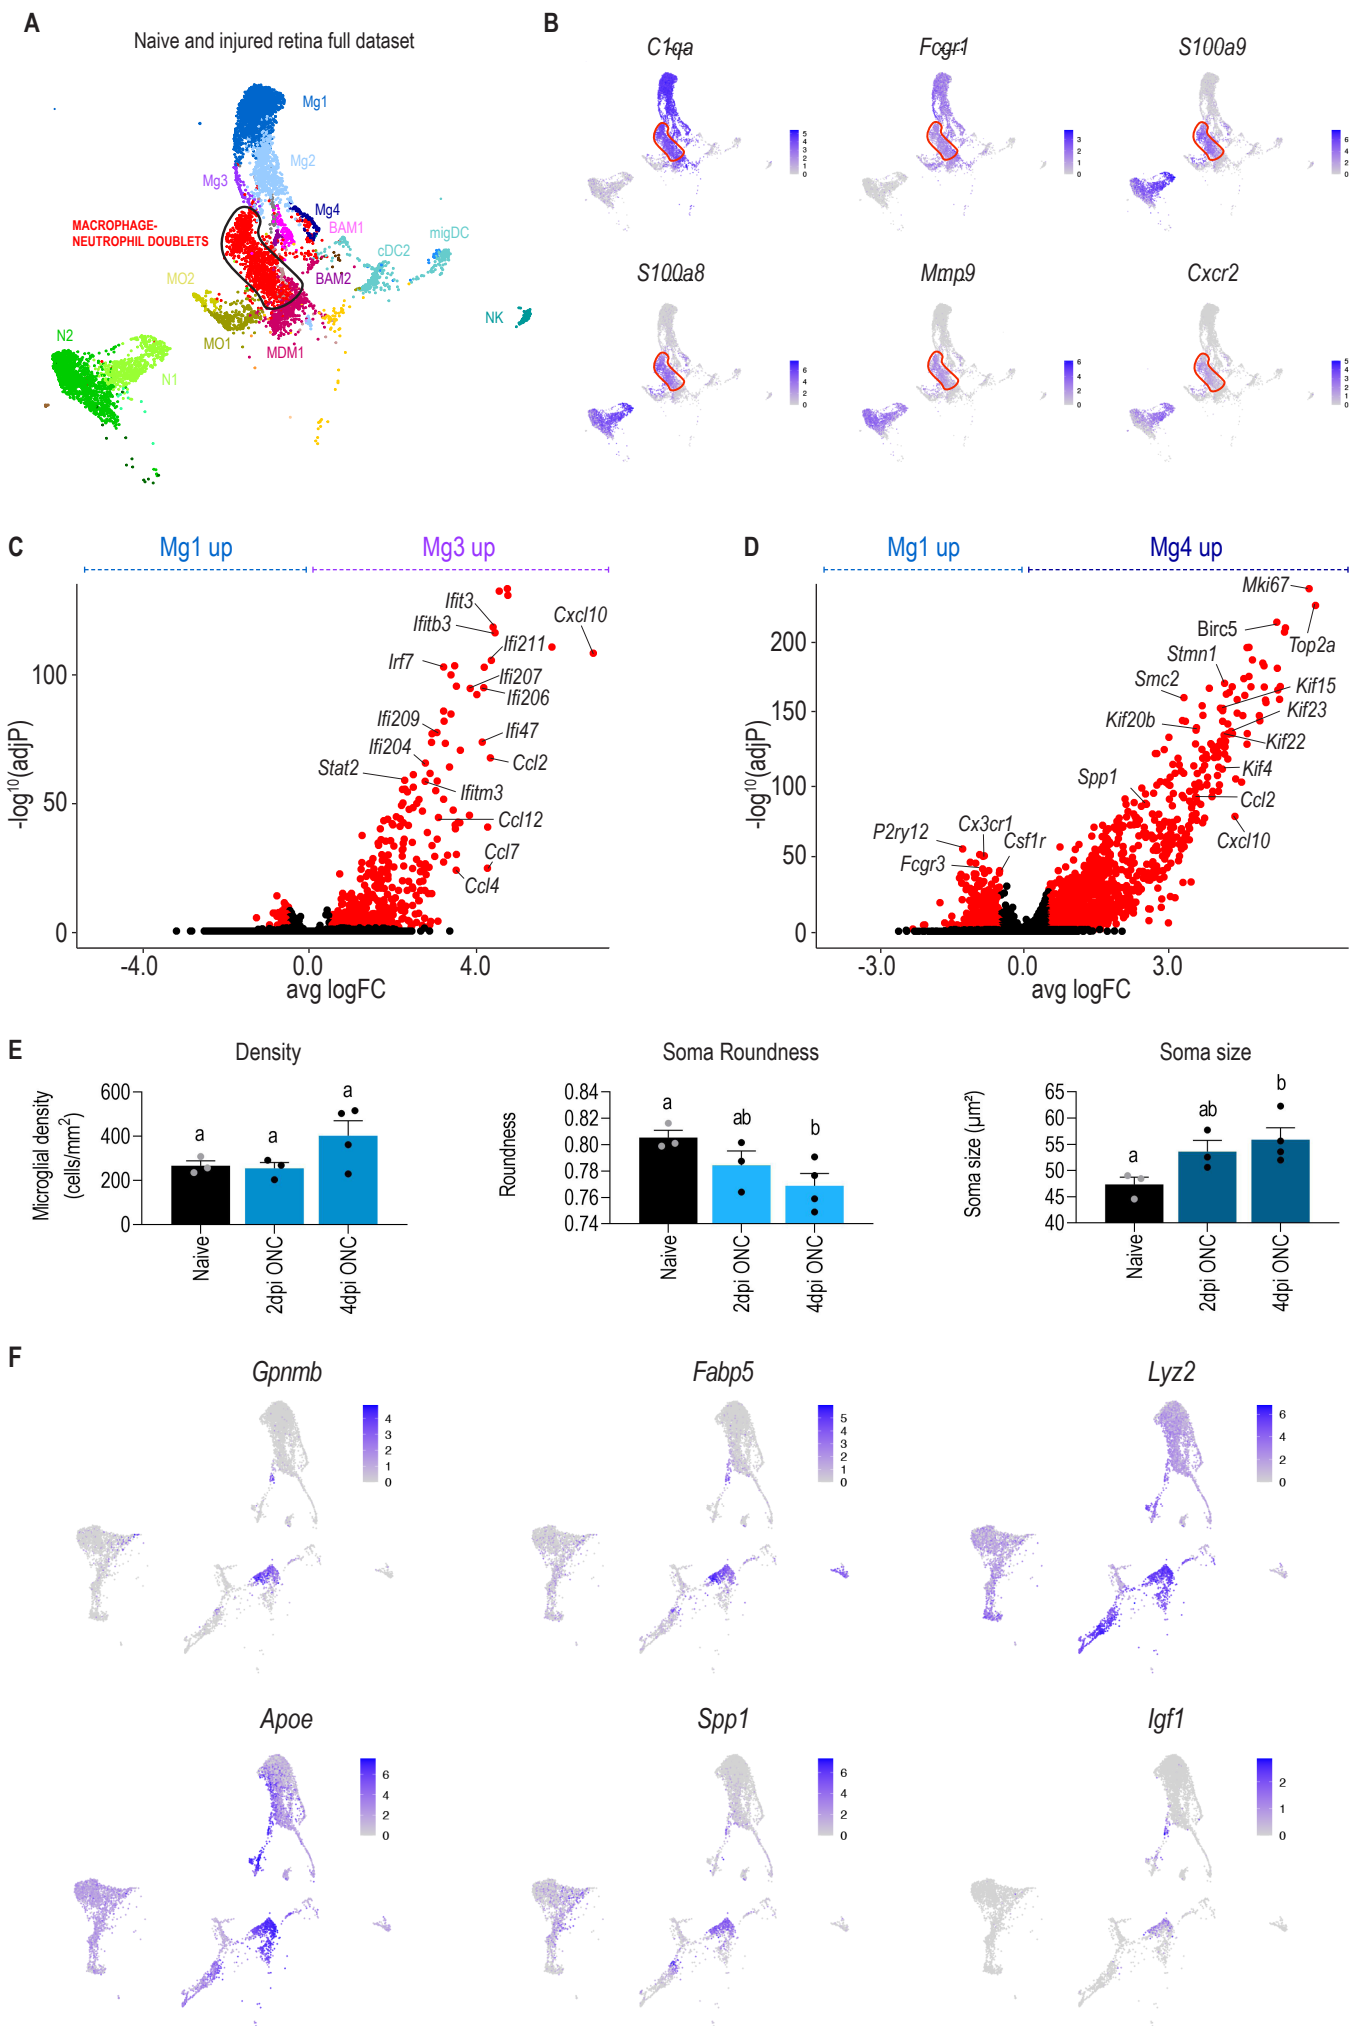

FIGURE S1
