# Supplementary material for: Immune stimulation recruits a subset of pro-regenerative macrophages to the retina that promotes axonal regrowth of injured neurons
Source: PubMed Central journal article supplement (PMC10210300; doi:10.1186/s40478-023-01580-3), 2023-05-24
Supplement: 40478_2023_1580_MOESM3_ESM.pdf [file 40478_2023_1580_MOESM3_ESM.pdf]

**A**

Full dataset

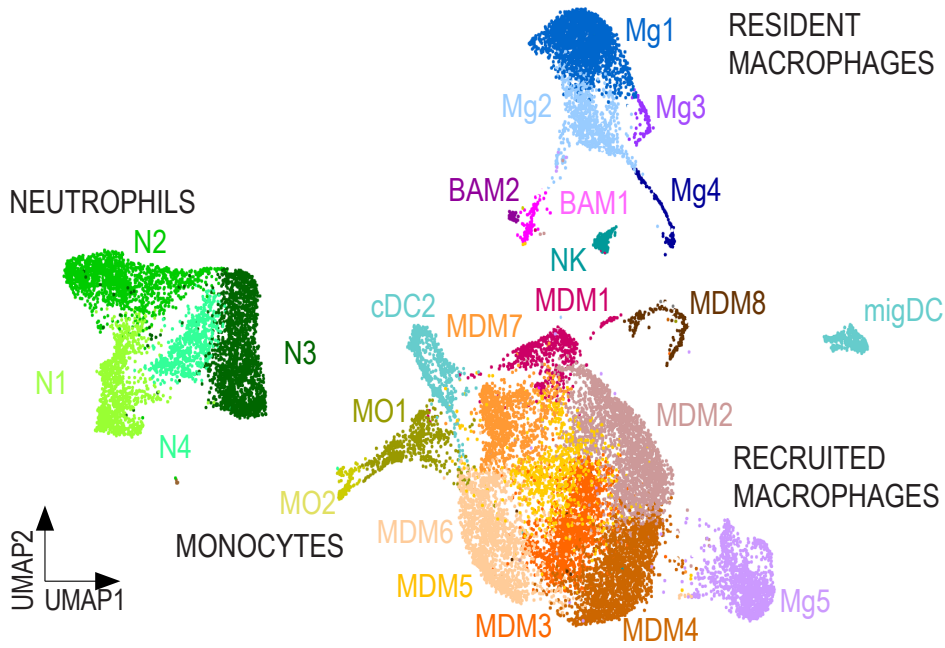

**B**

Regenerating (4dpi ONC+P3C)

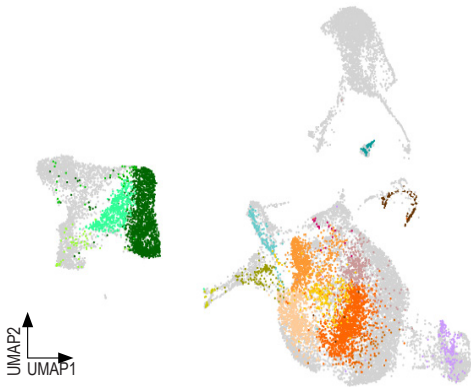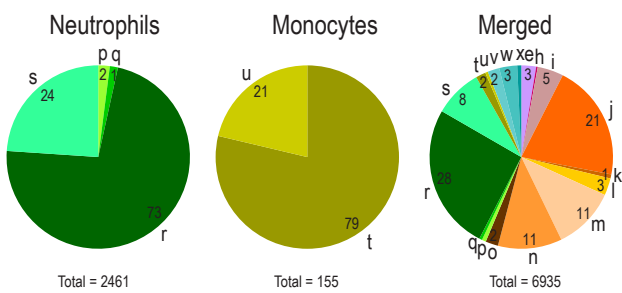

**C**

Regenerating (8dpi ONC+P3C)

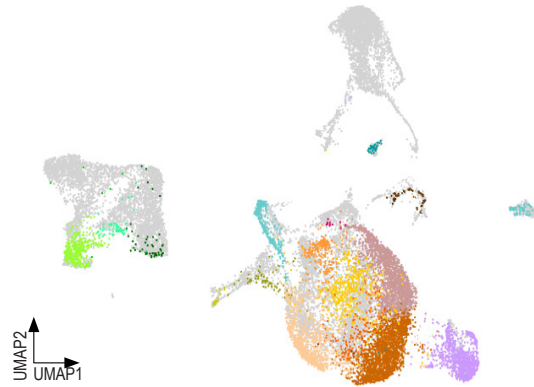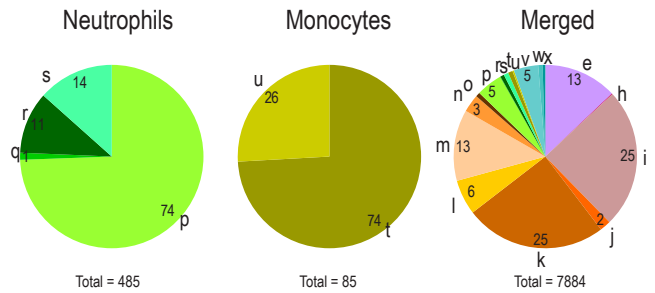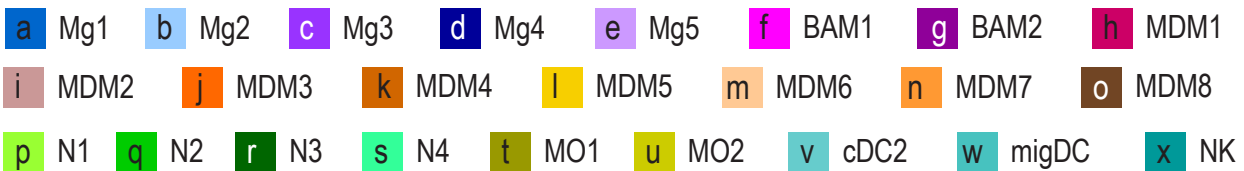

**FIGURE S3**
